# Supplementary material
Source: publisher figshare collection journal article supplement (https://acs.figshare.com/ndownloader/files/3760573)
Supplement: Supplementary file 1 [file 3760573]

# Supporting Information

## Tip-Enhanced Upconversion Luminescence in $\text{Yb}^{3+}$ - $\text{Er}^{3+}$ Codoped $\text{NaYF}_4$ Nanocrystals

Gengxu Chen<sup>1,2</sup>, Chengjie Ding<sup>1</sup>, E Wu<sup>1,\*</sup>, Botao Wu<sup>1</sup>, Ping Chen<sup>3</sup>, Xueting Ci<sup>1</sup>, Yan Liu<sup>1</sup>, Jianrong Qiu<sup>3</sup>, and Heping Zeng<sup>1,\*</sup>

<sup>1</sup> State Key Laboratory of Precision Spectroscopy, East China Normal University, Shanghai 200062, China.

<sup>2</sup> College of Physics and Information Engineering, Fuzhou University, Fuzhou 350116, China.

<sup>3</sup> State Key Laboratory of Silicon Materials, Zhejiang University, Hangzhou 310027, China.

\*Corresponding authors:

E Wu: E-mail: [ewu@phy.ecnu.edu.cn](mailto:ewu@phy.ecnu.edu.cn)

H. Zeng: E-mail: [hpzeng@phy.ecnu.edu.cn](mailto:hpzeng@phy.ecnu.edu.cn)

## Synthesis of the nanoparticles

According to Reference [1], the  $\text{NaYF}_4:\text{Yb}^{3+}/\text{Er}^{3+}$  nanoparticles were synthesized by co-precipitation method. The procedure was as followed:

- a) 0.02 mL methanol and 0.78 mL of  $\text{YCl}_3$  (1M), 1 mL of  $\text{YbCl}_3$  (0.2 M), 0.2 mL of  $\text{ErCl}_3$  (0.1 M) in methanol were added to a 50 mL flask. After homogeneous mixture by a magnetic stirring bar inside the flask, 3 mL oleic acid and 7 mL 1-octadecene were slowly added to the solution and heated the solution to 160 °C for 30 min. Then it was cooled down to room temperature.
- b) Subsequently, 1.4 mL methanol and 1.6 mL of  $\text{NH}_4\text{F}$  (1M), 2 mL of NaOH (0.5M) in methanol were added slowly and the solution was stirred for 30 min. After evaporating the methanol completely, the solution was heated to 300 °C under argon for 1.5 h and cooled down to room temperature.
- c) With the addition of ethanol, the nanoparticles were precipitated. Then they were collected by centrifugation and washed with methanol and ethanol a few times, and finally re-dispersed in cyclohexane.

## References

- [1] Wang, F.; Han, Y.; Lim, C. S.; Lu, Y.; Wang, J.; Xu, J.; Chen, H.; Zhang, C.; Hong, M.; Liu, X. Simultaneous phase and size control of upconversion nanocrystals through lanthanide doping. *Nature* **2010**, *463*, 1061-1065.
